# Supplementary material
Source: Springer Nature journal article supplement (https://www.springermedizin.de/resource/supplementary/12958_2009_552_MOESM3_ESM.pdf/9568288)

**TGF- $\beta$ 1**

**TGF- $\beta$ 2**

**TGF- $\beta$ 3**

**C-**

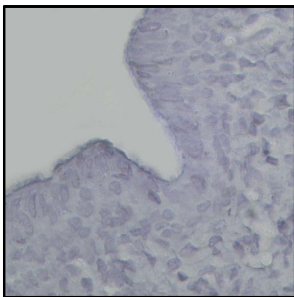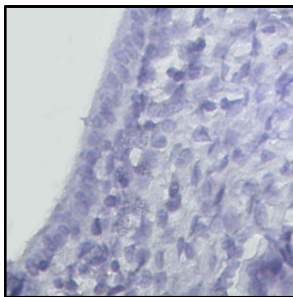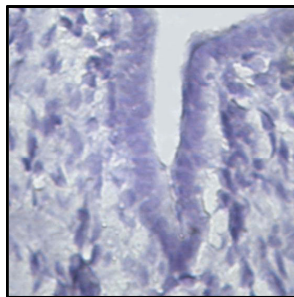

**Diestrus**

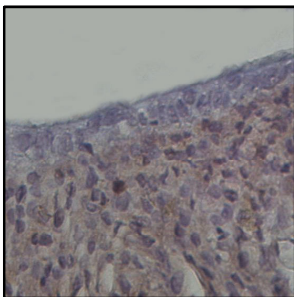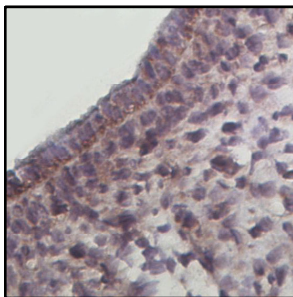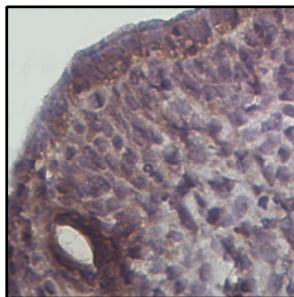

**Proestrus**

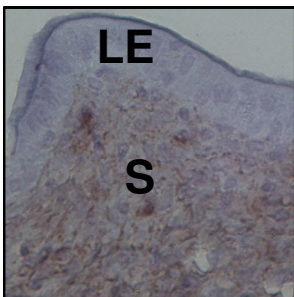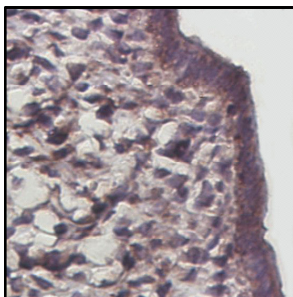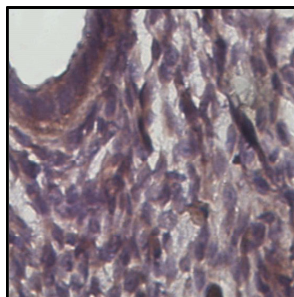

**Estrus**

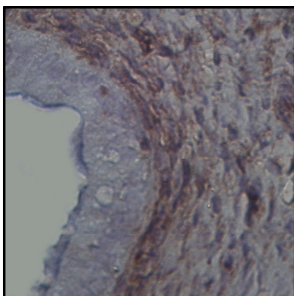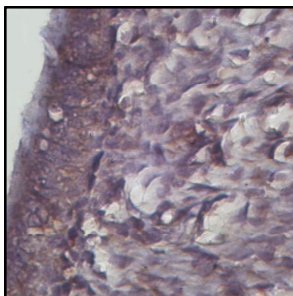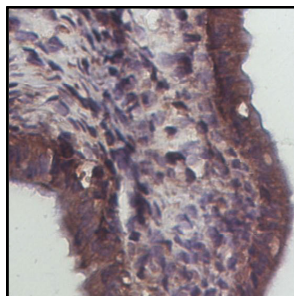

**Metestrus**

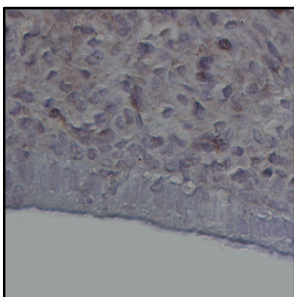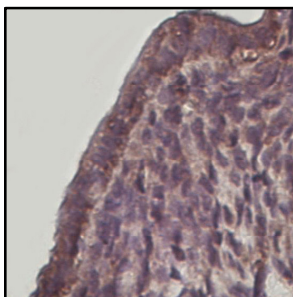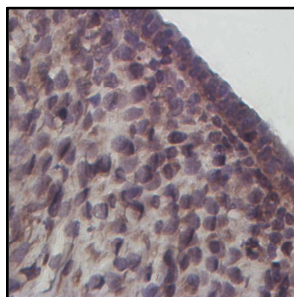

Supplement: MOESM3 [file 9568288]
